# Supplementary material for: Psychotropic drug use following venous thromboembolism versus diabetes mellitus in adolescence or young adulthood: a Danish nationwide cohort study
Source: PubMed Central journal article supplement — BMJ Open. 2019 May 14;9(5):e026159. doi: 10.1136/bmjopen-2018-026159 (PMC6530366; doi:10.1136/bmjopen-2018-026159), 2019-05-14
Supplement: bmjopen-2018-026159supp001.pdf [file bmjopen-2018-026159supp001.pdf]

**Supplementary table 1: ICD-10, ATC and procedure codes used in the study**

| <b>ICD-10, ATC and procedure codes</b>                                                                                                                                               |                                                                      |                                      |                                 |
|--------------------------------------------------------------------------------------------------------------------------------------------------------------------------------------|----------------------------------------------------------------------|--------------------------------------|---------------------------------|
|                                                                                                                                                                                      | <b>ICD 10 Codes</b>                                                  | <b>ATC Codes</b>                     | <b>Surgical procedure Codes</b> |
| Deep Venous Thrombosis                                                                                                                                                               | I801 I802 I803 I808 I809<br>I822                                     |                                      |                                 |
| Pulmonary Embolism                                                                                                                                                                   | I26                                                                  |                                      |                                 |
| Insulin depended diabetes mellitus                                                                                                                                                   | E100, E101, E109, E110,<br>E111, E119                                | A10                                  |                                 |
| Psychotropic drugs<br>Antidepressants<br>Antipsychotics<br>Anxiolytics<br>Sedatives                                                                                                  |                                                                      | N06A<br>N05A<br>N05B<br>N05CD, N05CF |                                 |
| Psychiatric diagnosis<br>Schizophrenia<br>Bi-polar<br>Depression<br>Anxiety<br>Addiction                                                                                             | F20<br>F30, F31<br>F322, F323, F332 F333<br>F40, F41, F93<br>F10-F19 |                                      |                                 |
| Risk factors for VTE<br>Cancer <sup>a</sup><br>Inflammatory bowel disease <sup>a</sup><br>Rheumatoid arthritis <sup>a</sup><br>Major surgery <sup>b</sup><br><br>Trauma <sup>b</sup> | C<br>K50, K51<br>M05, M06<br><br>S, T0, T10, T11, T12, T13,<br>T14   |                                      | A, B, F, G, H,<br>J, K, L,M,N,P |

<sup>a</sup>Within 1 year before diagnosis

<sup>b</sup>Within 90 days before diagnosis
